# Supplementary material for: ATP-activated decrosslinking and charge-reversal vectors for siRNA delivery and cancer therapy
Source: PubMed Central journal article supplement — Theranostics. 2018 Sep 9;8(17):4604–19. doi: 10.7150/thno.26889 (PMC6160761; doi:10.7150/thno.26889), 2018-09-09
Supplement: thnov08p4604s1.pdf [file thnov08p4604s1.pdf]

**ATP-activated decrosslinking and charge-reversal vectors for siRNA delivery and cancer therapy**

Zhanwei Zhou <sup>a</sup>, Qingyan Zhang <sup>a</sup>, Minghua Zhang <sup>a</sup>, Huipeng Li <sup>a</sup>, Gang Chen <sup>a</sup>,  
Chenggen Qian <sup>a</sup>, David Oupicky <sup>a, b\*</sup>, Minjie Sun <sup>a\*</sup>

<sup>a</sup> State Key Laboratory of Natural Medicines, Department of Pharmaceutics, China  
Pharmaceutical University, 24 Tong Jia Xiang, Nanjing 210009, P. R. China

<sup>b</sup> Center for Drug Delivery and Nanomedicine Department of Pharmaceutical Sciences  
University of Nebraska Medical Center Omaha, NE 68198, USA

\* Corresponding authors:

Prof. Minjie Sun, Phone /Fax: +86 25 83271098, Email: [msun@cpu.edu.cn](mailto:msun@cpu.edu.cn)

Prof. David Oupicky, E-mail: [david.oupicky@unmc.edu](mailto:david.oupicky@unmc.edu)

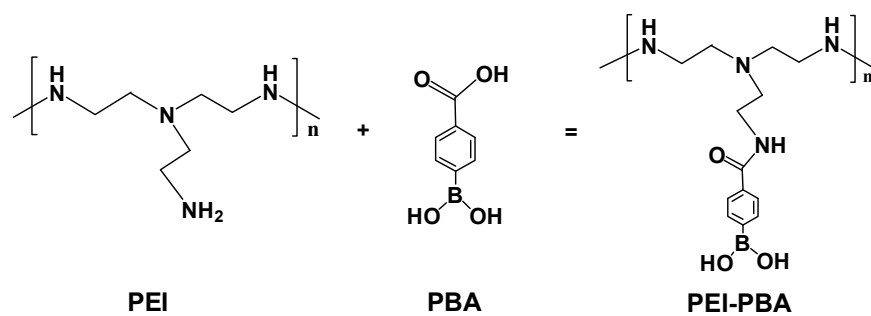

**Figure S1.** Synthesis procedure of PEI-PBA.

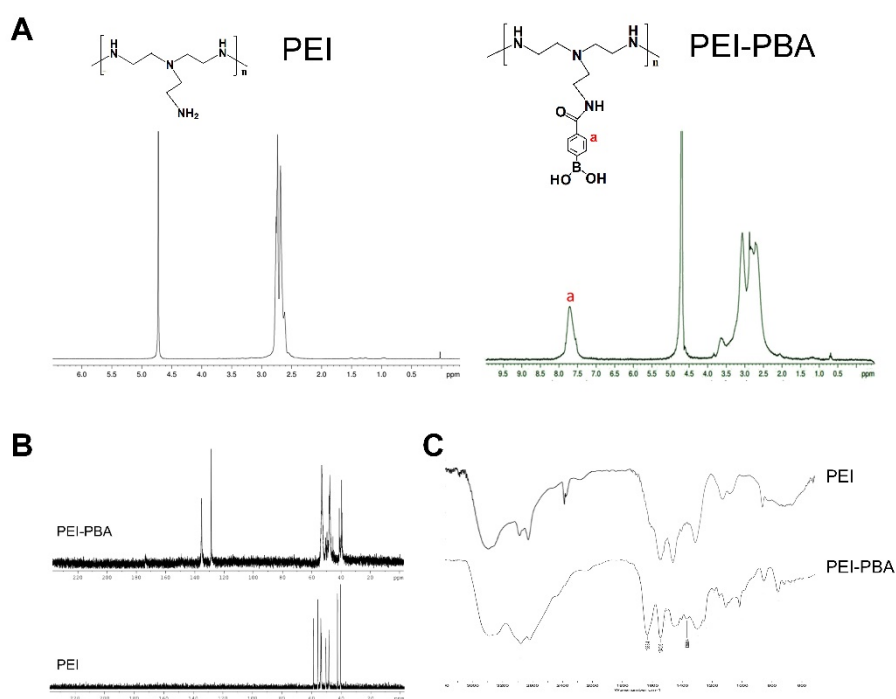

**Figure S2.** Characterization of PEI-PBA. **(A)** The  $^1\text{H}$  NMR spectra **(B)**  $^{13}\text{C}$ -NMR spectra and **(C)** the FTIR spectrum of PEI and PEI-PBA.

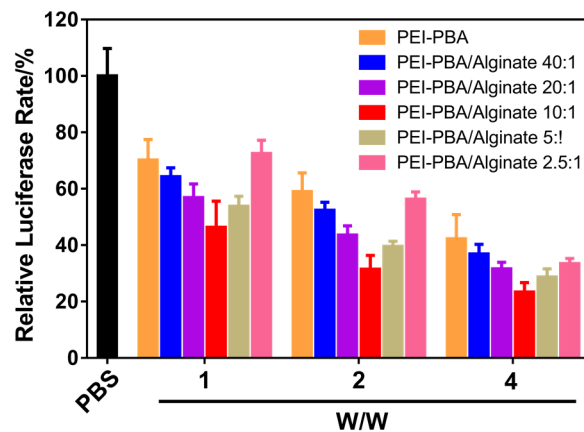

**Figure S3.** Luciferase silencing of CrossPPA/siLuc on 4T1 cells at different w/w ratios of PEI-PBA/Alginate (n=3).

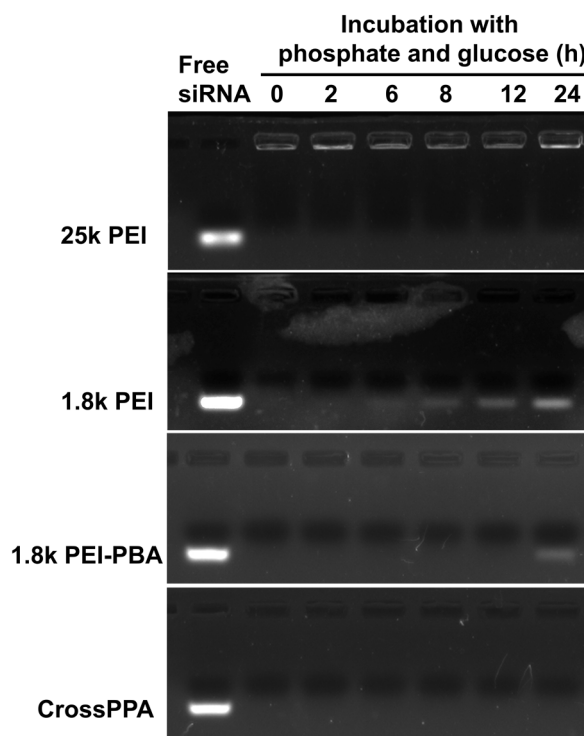

**Figure S4.** Stability of polyplexes in phosphate and glucose.

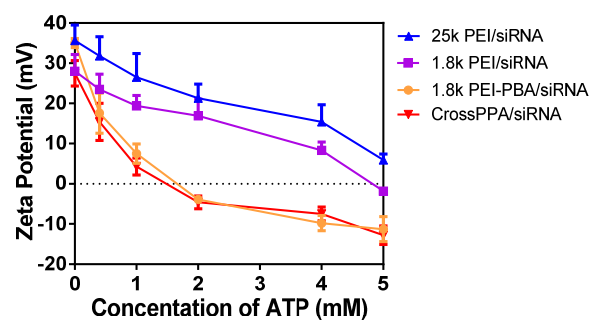

**Figure S5.** Charge reversal of 25k PEI/siRNA, 1.8k PEI/siRNA, PEI-PBA/siRNA and CrossPPA/siRNA with the different amount of ATP adding.

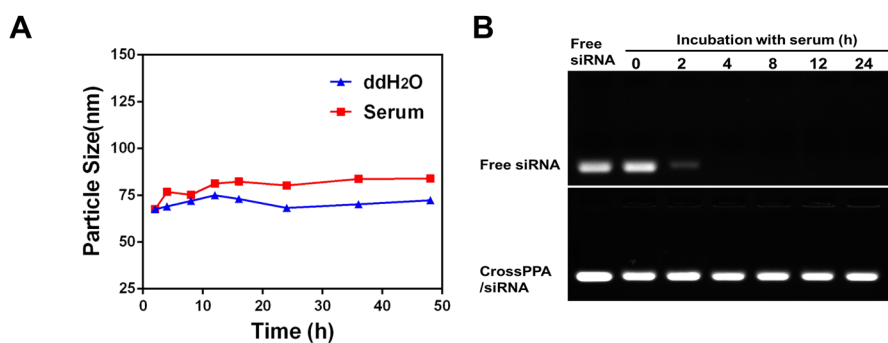

**Figure S6. (A)** Colloidal stability and serum stability of CrossPPA/siRNA polyplex.

**(B)** Serum stability of naked siRNA and CrossPPA/siRNA, determined by agarose gel electrophoresis.

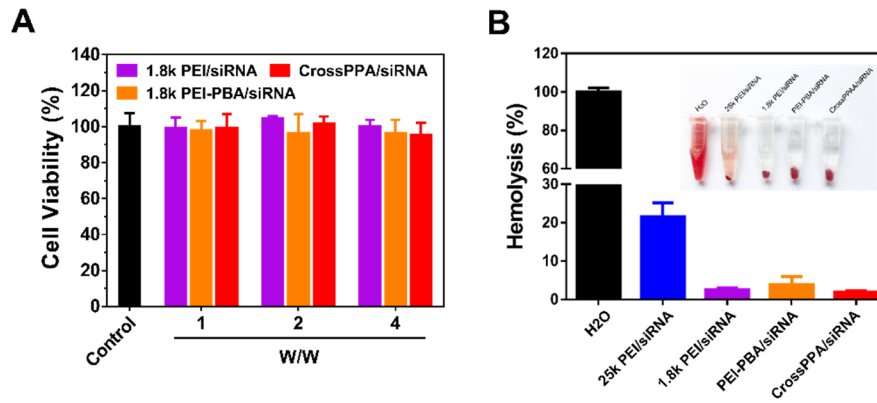

**Figure S7.** (A) Cytotoxicity of different polyplexes at various w/w ratios. (B) Hemolysis assay of 25k PEI, 1.8k PEI, PEI-PBA and CrossPPA polyplexes.

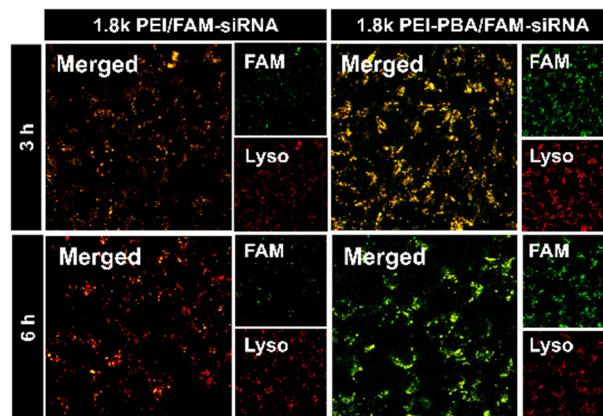

**Figure S8.** Endosomal escape of 1.8k PEI/siRNA and 1.8k PEI-PBA/siRNA in 4T1 cells, siRNA was labeled with FAM and lysosome/endosome was stained with LysoTracker Red.

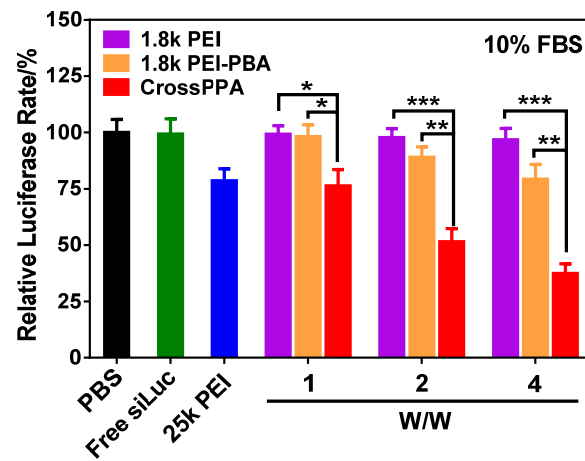

**Figure S9.** siLuc transfection and gene silencing under 10% FBS condition. Bars shown are mean $\pm$  SD (n= 3). \* p < 0.05, \*\* p < 0.01, \*\*\* p < 0.001.

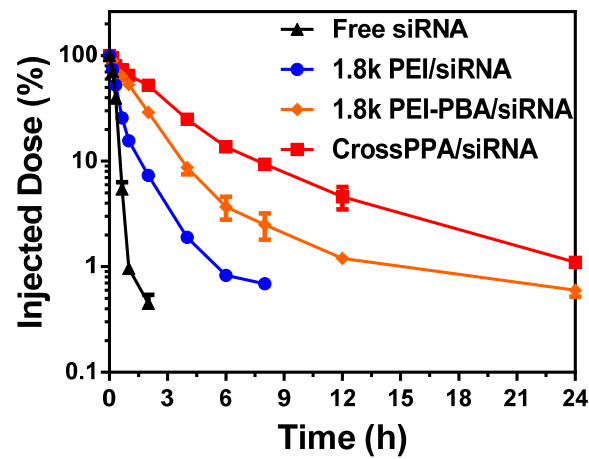

**Figure S10.** Pharmacokinetics study of Free siRNA, 1.8k PEI/siRNA, 1.8k PEI-PBA/siRNA and CrossPPA/siRNA.

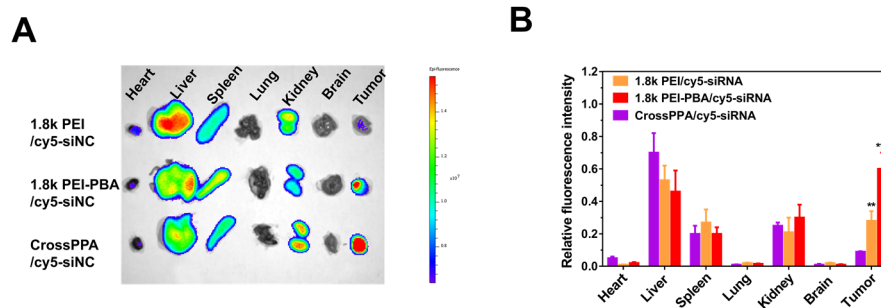

**Figure S11.** (A) Fluorescence signals of *ex*-organs and tumors at 48h. (B) Fluorescence quantitative analysis. Bars shown are mean  $\pm$  SD (n= 3). \*\*p < 0.01, \*\*\*p < 0.001.

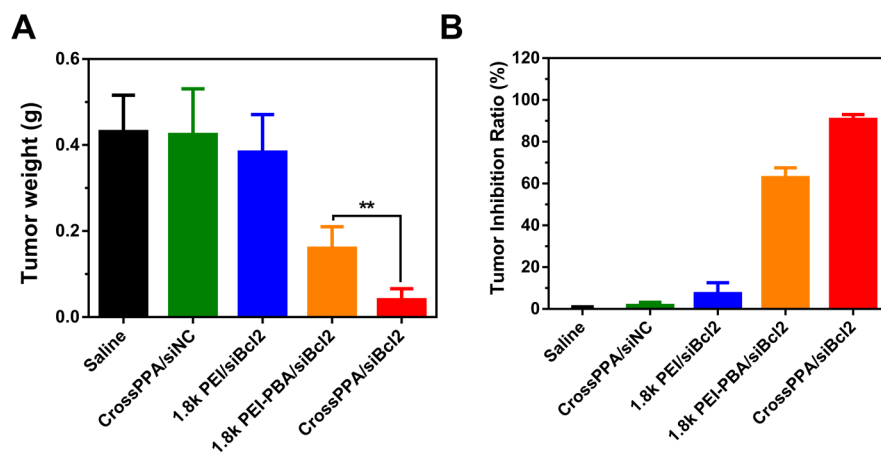

**Figure S12.** (A) Tumor weight analysis of each group. Data are shown as mean  $\pm$  SD (n= 6). \*\*p<0.01. (B) Tumor inhibition analysis of each group.

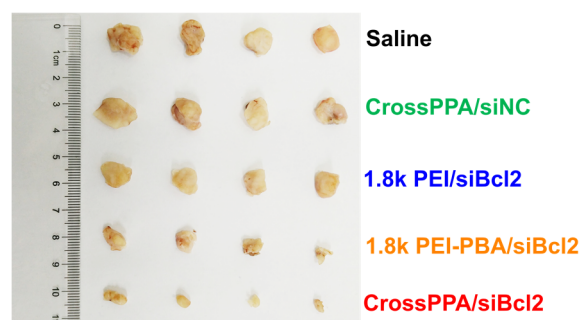

**Figure S13.** Representative images of *ex*-tumors, taken on Day 20.

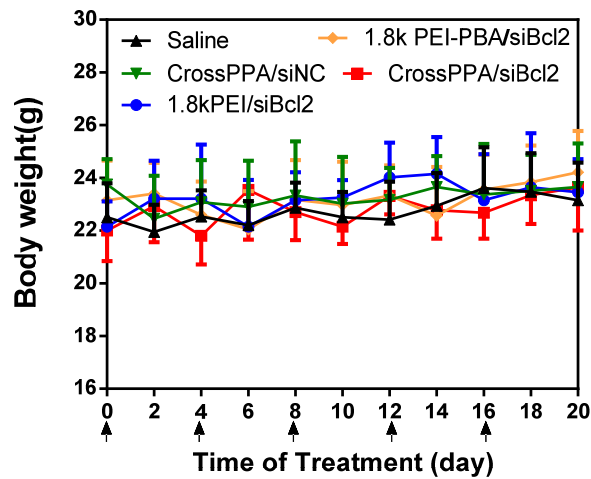

**Figure S14.** Graph showing the change in the body weights of 4T1 tumor-bearing mice over the treatment period.

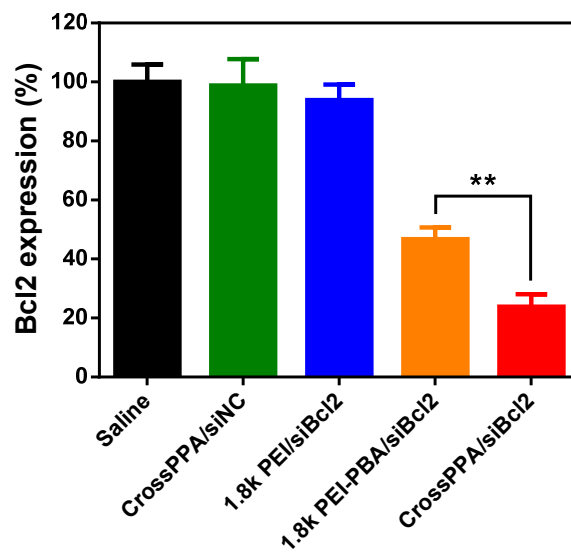

**Figure S15.** Semiquantitative analysis of the western blot bands by Image J software.
